# Supplementary material for: Granulocyte-macrophage colony stimulating factor (GM-CSF) is fully expressed in the genital tract, seminal plasma and spermatozoa of male pigs
Source: PubMed Central journal article supplement (PMC7414873; doi:10.1038/s41598-020-70302-9), 2020-08-07
Supplement: 41598_2020_70302_MOESM1_ESM.pdf [file 41598_2020_70302_MOESM1_ESM.pdf]

# **Granulocyte-Macrophage Colony Stimulating Factor (GM-CSF) is fully expressed in the genital tract, seminal plasma and spermatozoa of male pigs**

Lorena Padilla<sup>1,3</sup>, Jesús Martínez-Hernández<sup>2,3</sup>, Isabel Barranco<sup>1,3,4</sup>, Xiomara Lucas<sup>1,3</sup>, Luis M. Pastor<sup>2,3</sup>, Heriberto Rodríguez-Martínez<sup>5</sup>, Jordi Roca<sup>1,3</sup>, Inmaculada Parrilla<sup>1,3\*</sup>

<sup>1</sup>Department of Medicine and Animal Surgery, Faculty of Veterinary Science, University of Murcia, Murcia 30100, Spain

<sup>2</sup>Department of Cell Biology and Histology, School of Medicine, University of Murcia, Murcia 30100, Spain

<sup>3</sup>IMIB-Arrixaca, Regional Campus of International Excellence, Campus Mare Nostrum, University of Murcia, Murcia 30100, Spain

<sup>4</sup>Biotechnology of Animal and Human Reproduction (TechnoSperm), Department of Biology, Faculty of Sciences, Institute of Food and Agricultural Technology, University of Girona, Girona 17003, Spain

<sup>5</sup>Department of Biomedical and Clinical Sciences (BKV), Linköping University, Linköping, SE 58185, Sweden

\* Corresponding author: Inmaculada Parrilla ([parrilla@um.es](mailto:parrilla@um.es))

**Supplemental Information.** Six supplementary figures and one supplementary table.

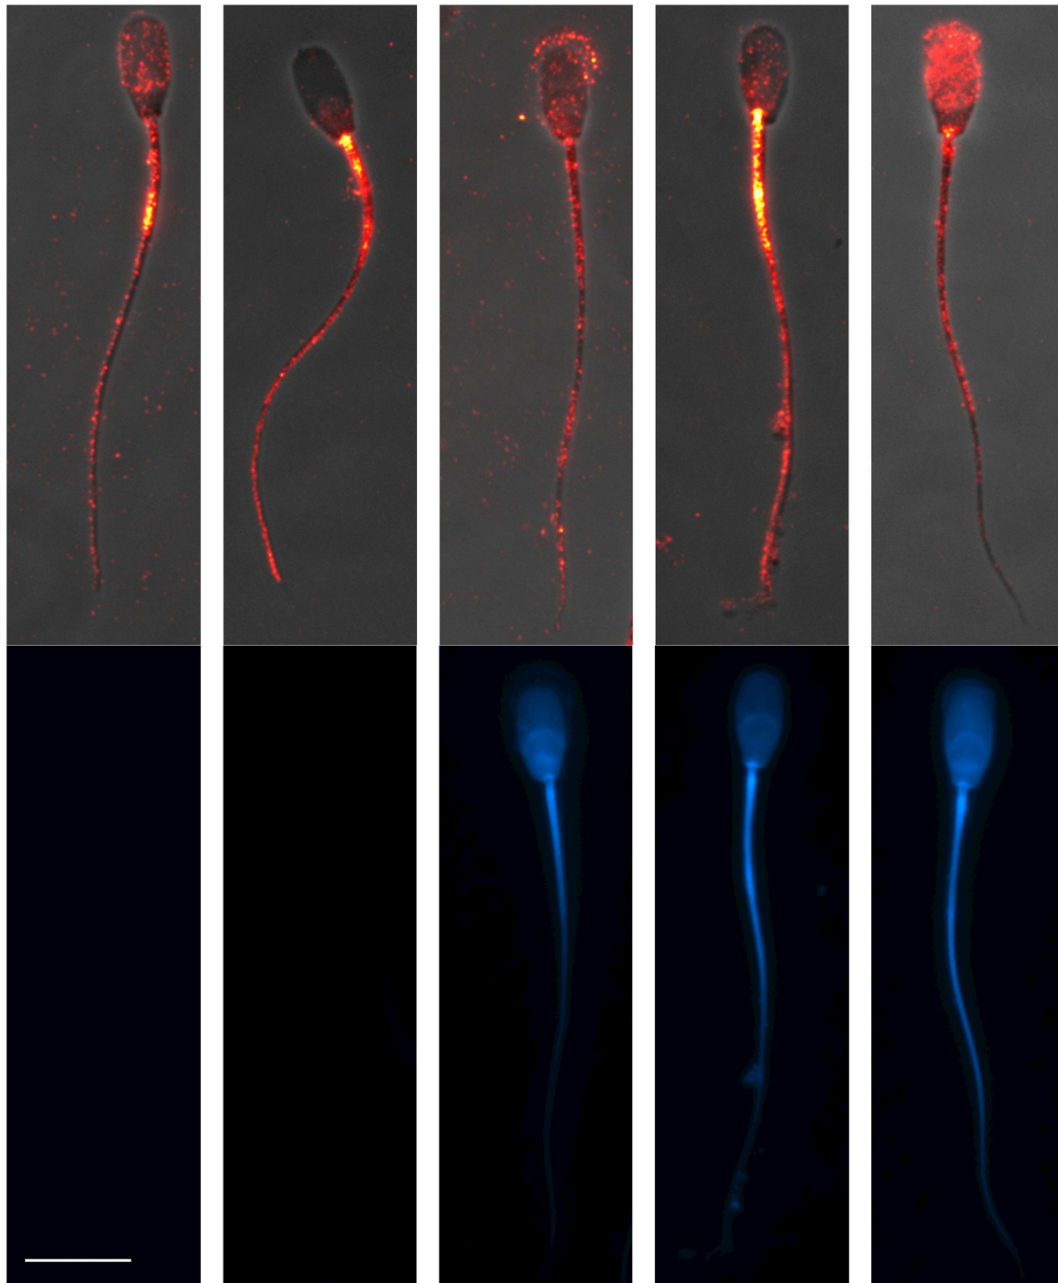

**Supplementary Fig S1. Heterogeneous expression of GM-CSF in the pig mature spermatozoa.** Sperm samples were incubated with the antibody anti GM-CSF (orb6090, Biorbyt) to identify GM-CSF expression (in red in top images) and with DAPI staining to identify viable from non-viable spermatozoa (DAPI positive in blue in bottom images). Spermatozoa displayed a heterogeneous distribution in fluorescence, more intense in midpiece and sperm flagellum, which is substantially evident in non-viable spermatozoa. Scale bar: 10  $\mu\text{m}$ . Cropped image of immunocytochemistry capture (see Supplemental Information, Fig S5 for full image).

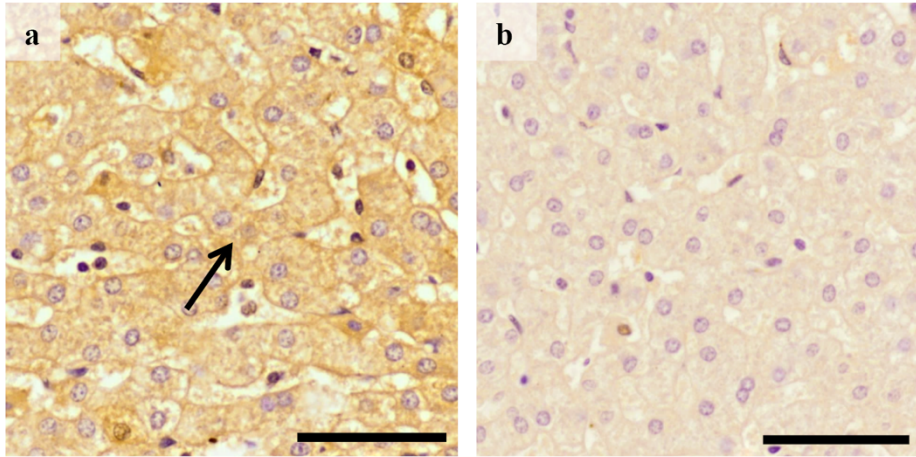

**Supplementary Fig S2. Expression of GM-CSF in pig liver.** (a) Positive control: Liver tissue incubated with antibody anti GM-CSF (orb6090, Biorbyt) showing expression of GM-CSF in hepatocyte cytoplasm (arrow). (b) Negative control: Liver tissue non-incubated with primary antibody. Scale bar 50 $\mu$ m.

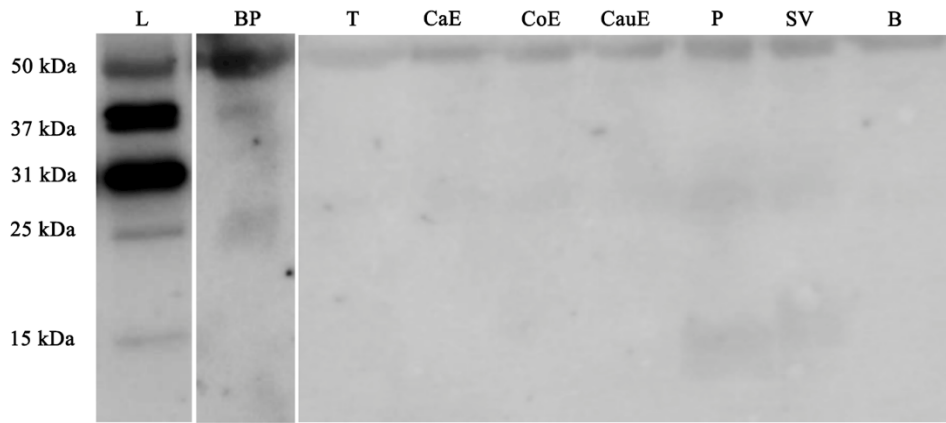

**Supplementary Fig S3. Western Blot results of male pig reproductive tissues incubated with blocking peptide.** T: testis; CaE: caput epididymis; CoE: corpus epididymis; CauE: cauda epididymis; P: prostate; SV: seminal vesicle; and B: bulbourethral gland. L: Expression of GM-CSF in liver tissue, as control. BP: Liver tissue incubated with blocking peptide. Cropped image of Western blot (see Supplemental Information, Figure S6 for full image).

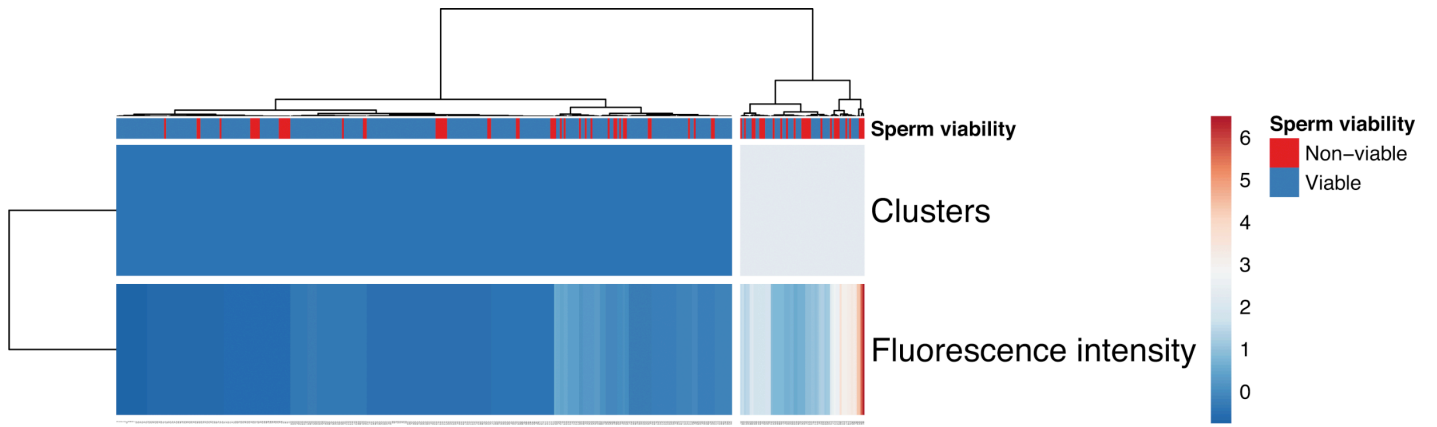

**Supplementary Fig S4. Dendrogram.** Diagram representing a tree for hierarchical two-step clustering by Euclidean distance and Ward linkage. The color scale indicate the relative expression of GM-CSF fluorescence intensity: red shows higher expression and blue lower expression. Each column represents one spermatozoon. Column annotations indicate the sperm viability, non-viable in red and viable in blue.

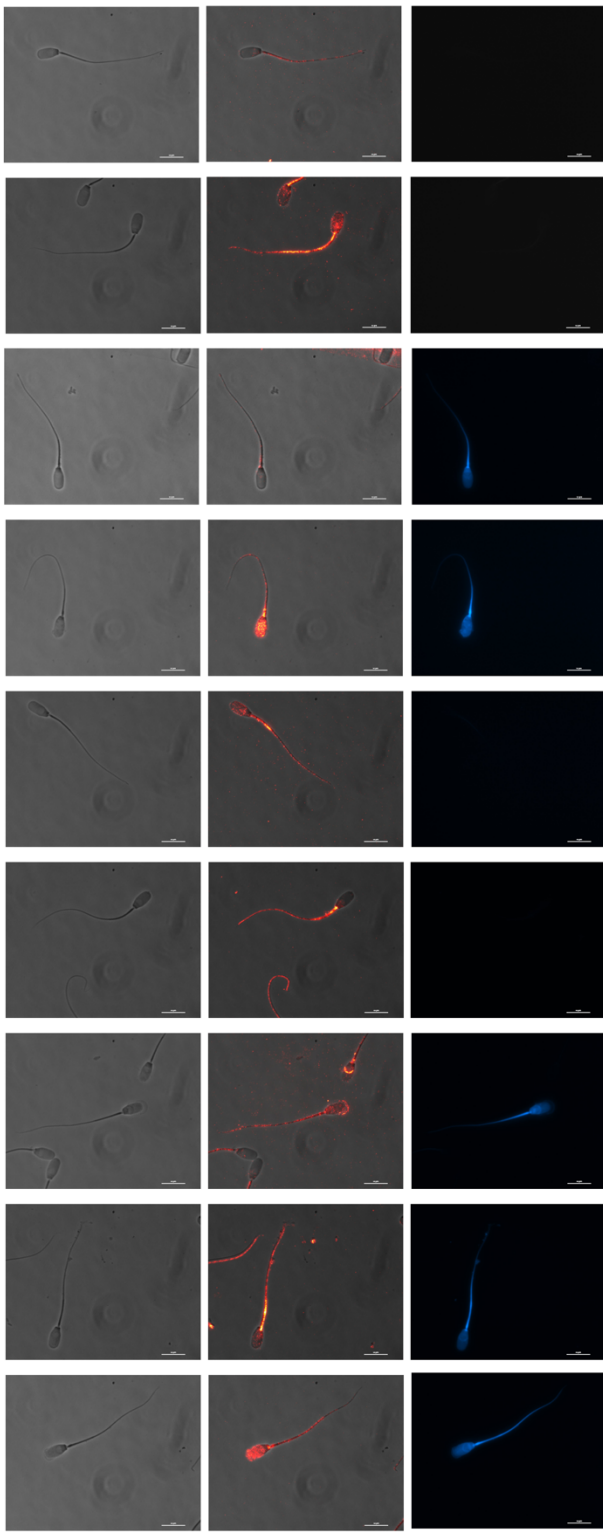

Full image of Figure 5 in the main text.

Full image of Supplementary Figure S3 in the main text.

**Supplementary Fig S5. Raw data for expression of GM-CSF in the pig mature spermatozoa.** Bright-field in left images. Sperm samples were incubated with the antibody anti GM-CSF (orb6090, Biorbyt) to identify GM-CSF expression (composite in red in center images, merging fluorescence and bright-field images) and with DAPI staining to identify viable from non-viable spermatozoa (DAPI positive in blue in right images). The acquisition conditions for bright-field images were 100 ms, 1.00x of gain and high contrast; and for all fluorescence images 150 ms, 1.70x of gain and high contrast. The size of all images was  $1280 \times 1024$  pixels and 32 bit/pixel. The look up table (LUT) used to identify GM-CSF expression was *red hot* and the LUT to identify non-viable spermatozoa, DAPI positive was *cyan hot*. Scale bar  $10\mu\text{m}$ .

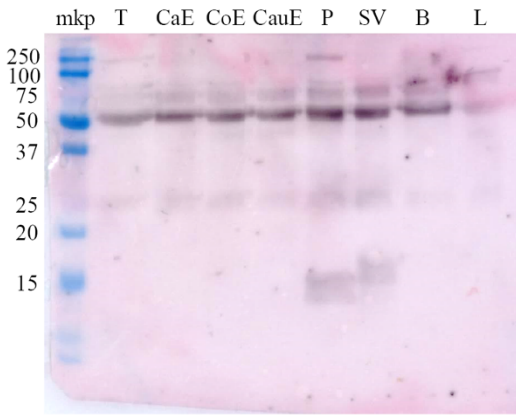

Blocking peptide. Full image of Figure S3

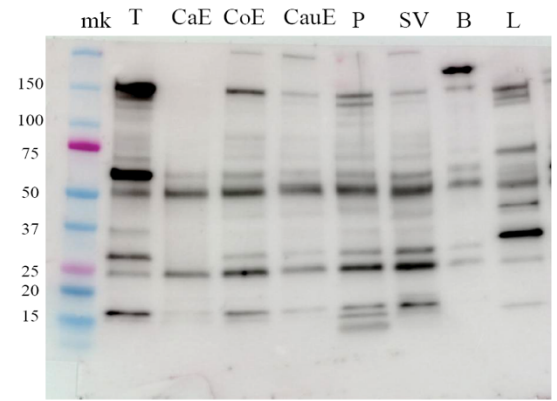

GM-CSF blot in porcine genital tract. 5 min of exposure time. Used in densitometry of 40, 31 and 15 kDa band. Full image of Figure 7 (a1-4)

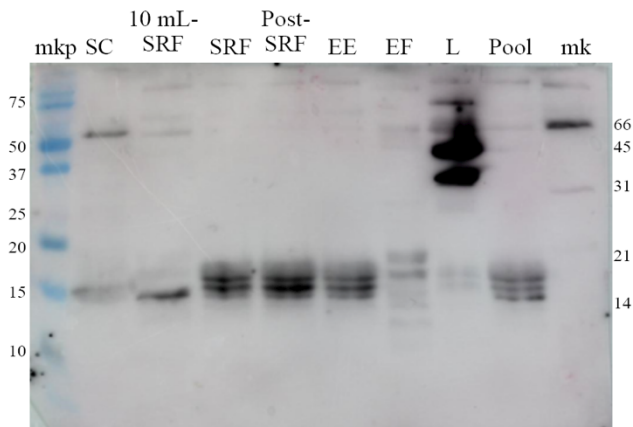

GM-CSF blot in epididymal fluid and seminal plasma from different ejaculated portions. 3 min of exposure time. Used in densitometry of 15 kDa band. Full image of Figure 7 (b1-2)

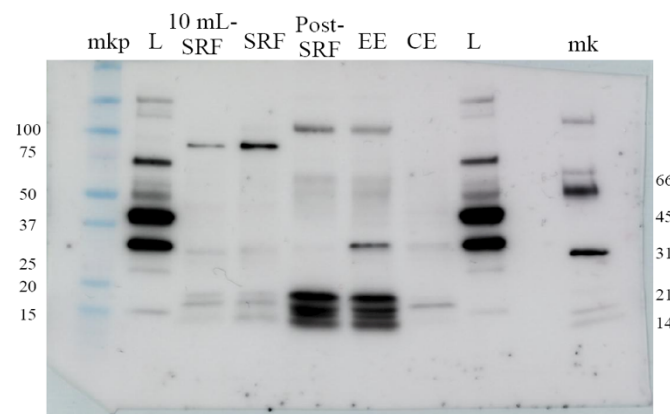

GM-CSF blot in spermatozoa from cauda epididymis and different ejaculated portions. 3 min of exposure time. Used in densitometry of 15 kDa band. Full image of Figure 7 (c1, c2)

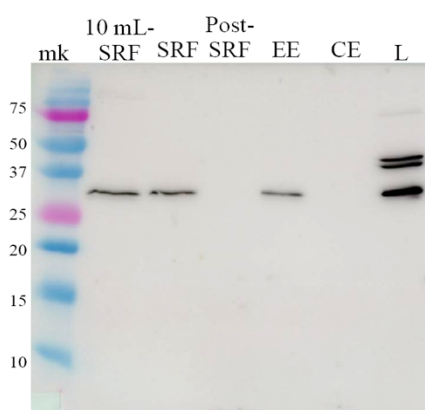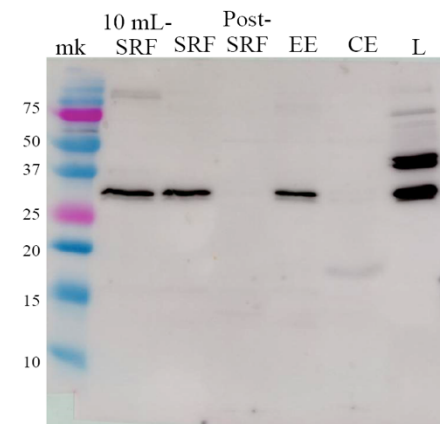

GM-CSF blot in spermatozoa from cauda epididymis and different ejaculated portions. 30 s (left) and 1 min (right) of exposure time. Used in densitometry of 31 kDa band. Full image of Figure 7 (c1, c3)

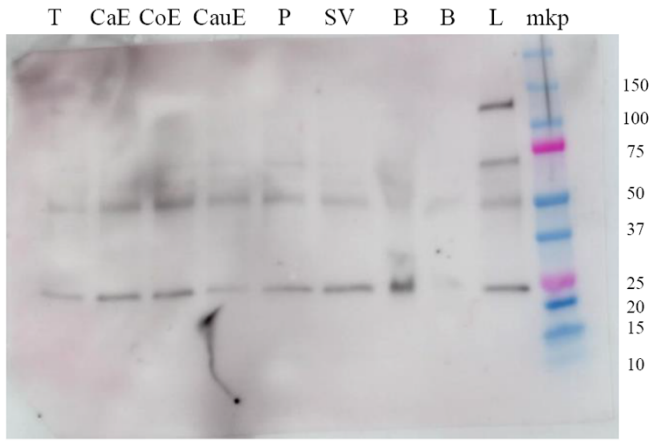

Negative Western blot in porcine genital tract with primary antibody absent. 4 min of exposure time.

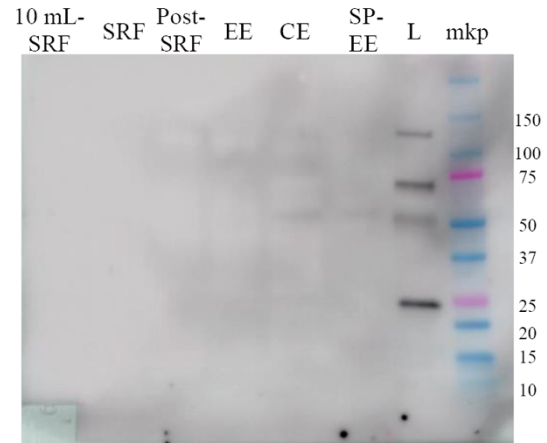

Negative Western blot in spermatozoa from different ejaculated portions and seminal plasma with primary antibody absent. 4 min of exposure time.

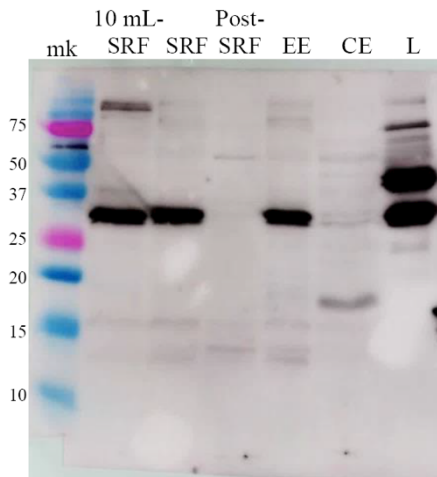

GM-CSF blot in spermatozoa from cauda epididymis and different ejaculated portions. 2 min of exposure time. Not used in densitometry.

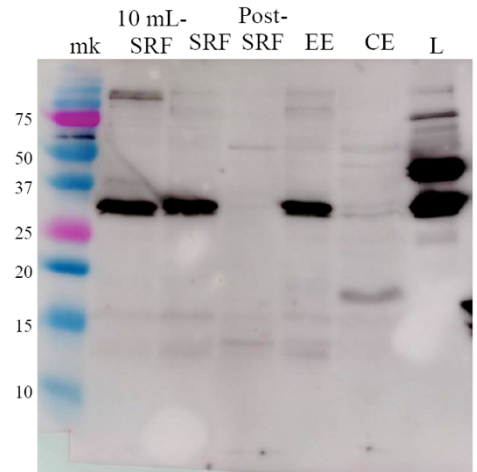

GM-CSF blot in spermatozoa from cauda epididymis and different ejaculated portions. 3 min of exposure time. Not used in densitometry.

mkp: Precision Plus Protein Dual Colour Standards. Catalog Number #1610374  
 mk: SDS-PAGE Molecular Weight Standards. Broad Range. Catalog Number 161-0317  
 SC: HeLa Whole Cell Lysate: Positive control SC-2200 Santa Cruz Biotechnology

**Supplementary Fig S6. Raw data for Western blot results.** T: testis; CaE: caput epididymis; CoE: corpus epididymis; CauE: cauda epididymis; P: prostate; SV: seminal vesicle; B: bulbourethral gland; epididymal fluid: EF; SP from the different ejaculate portions: first 10 mL of the SRF (10 mL-SRF), rest of SRF, post-SRF, entire ejaculate (EE); mature spermatozoa from cauda epididymis (CE), 10 mL-SRF, rest of SRF, post-SRF and EE. L: expression in liver tissue, as control. Western blot densitometry was analysed using different exposure times in blots, avoiding saturated Western blot.



**Supplementary Table S1.** Quality parameters (mean percentage  $\pm$  SEM) of pig mature spermatozoa from the cauda epididymis and ejaculate fractions, namely first 10 mL of the sperm-rich fraction [SRF], rest of SRF, post-SRF and entire ejaculate [EE] collected to male pigs used in study.

| Sperm parameters (%)              | Source of mature spermatozoa |                 |                |                 |                |
|-----------------------------------|------------------------------|-----------------|----------------|-----------------|----------------|
|                                   | Cauda epididymis             | Ejaculate       |                |                 |                |
|                                   |                              | First 10 mL-SRF | Rest of SRF    | Post-SRF        | EE             |
| Total motility <sup>1</sup>       | 60.3 $\pm$ 2.4               | 82.0 $\pm$ 2.5  | 80.7 $\pm$ 5.8 | 71.7 $\pm$ 4.0  | 83.0 $\pm$ 3.8 |
| Progressive motility <sup>1</sup> | 37.0 $\pm$ 2.6               | 40.7 $\pm$ 3.2  | 42.7 $\pm$ 9.8 | 40.7 $\pm$ 11.6 | 49.0 $\pm$ 8.7 |
| Viability <sup>2</sup>            | 94.5 $\pm$ 0.5               | 84.5 $\pm$ 6.4  | 87.5 $\pm$ 2.1 | 77.9 $\pm$ 6.4  | 88.3 $\pm$ 1.6 |

<sup>1</sup>Sperm motility was evaluated using CASA (Proiser R+D, Paterna, Spain). Total motility was recorded as the percentage of total motile spermatozoa (average path velocity  $\geq 20 \mu\text{m/s}$ ); progressive motility was the proportion of motile spermatozoa showing rapid and progressive movement (straight line velocity  $\geq 40 \mu\text{m/sec}$ ).

<sup>2</sup>Sperm viability was assessed by flow cytometry (BD FACS Canto II flow cytometer; Becton Dickinson & Company, Franklin Lakes, NJ, USA). Triple stain was performed by the association of Hoechst 33342 (H-42) with Propidium Iodide (PI) and peanut agglutinin conjugated to FITC (PNA-FITC). Viable spermatozoa were those H-42 positive exhibiting intact plasma and acrosome membranes (PI negative and PNA-FITC negative) and were reported as percentages.
